# Supplementary material for: Comprehensive Expression Profiling and Functional Network Analysis of p53-Regulated MicroRNAs in HepG2 Cells Treated with Doxorubicin
Source: PLoS One. 2016 Feb 17;11(2):e0149227. doi: 10.1371/journal.pone.0149227 (PMC4757586; doi:10.1371/journal.pone.0149227)
Supplement: S5 Table — (XLSX) [file pone.0149227.s005.xlsx]

## Sheet: Sheet1
miRNA-mediated feed-forward loops in pathways in cancer
p53-miR-3662-VHL
p53-miR-148a-PTGS2
p53-miR-29a-PTEN
p53-miR-27a-MSH6
p53-miR-148a-MDM2
p53-miR-27a-MAPK3
p53-miR-148a-MAPK1
p53-miR-1277-HIF1A
p53-miR-3662-HDAC2
p53-miR-590-EP300
p53-miR-148a-CDKN1A
p53-miR-27a-ABL1
p53-miR-148a-BCL2
p53-miR-29a-GSK3B
p53-miR-29a-IGF1R
p53-miR-34a-MYC
p53-miR-27a-VHL
p53-miR-148a-PTEN
p53-miR-27a-PTEN
p53-miR-148a-MSH2
p53-miR-9-2-MDM2
p53-miR-27a-MAPK1
p53-miR-148a-HSP90AA1
p53-miR-29a-HIF1A
p53-miR-3662-HDAC1
p53-miR-148a-EP300
p53-miR-27a-CDKN1A
p53-miR-29a-ABL1
p53-miR-27a-BCR
p53-miR-590-GSK3B
p53-miR-148a-IGF1R
p53-miR-590-MYC
p53-miR-29a-SMAD2
p53-miR-1277-PTEN
p53-miR-34c-NFKBIA
p53-miR-27a-MDM2
p53-miR-27a-MAPK9
p53-miR-222-MAPK1
p53-miR-9-2-HSP90AA1
p53-miR-148a-HIF1A
p53-miR-3662-ETS1
p53-miR-1277-DAPK1
p53-miR-590-CDKN1A
p53-miR-27a-AR
p53-miR-3662-CDC42
p53-miR-9-2-GSK3B
p53-miR-27a-IGF1R
p53-miR-148a-MYC
p53-miR-148a-SMAD2
p53-miR-1323-PTEN
p53-miR-29a-MSH6
p53-miR-590-MDM2
p53-miR-590-MAPK8
p53-miR-9-2-MAPK1
p53-miR-9-2-HIF1A
p53-miR-590-HIF1A
p53-miR-9-2-EP300
p53-miR-148a-CTBP1
p53-miR-590-CASP8
p53-miR-34c-BCL2
p53-miR-3662-GSK3B
p53-miR-590-IGF1R
p53-miR-27a-MYC
p53-miR-148a-RB1
